# Supplementary material for: Novel coaching cricket bat: can it be used to enhance the backlift and performance of junior cricket batsmen?
Source: PubMed Central journal article supplement — BMJ Open Sport Exerc Med. 2016 Nov 4;2(1):e000141. doi: 10.1136/bmjsem-2016-000141 (PMC5125426; doi:10.1136/bmjsem-2016-000141), 2016-11-04
Supplement: bmjsem-2016-000141supp_figures.pdf [file bmjsem-2016-000141supp_figures.pdf]

Figure 7. Images showcasing the batting backlift techniques of the control group (n = 6) over six weeks in the frontal plane

| <u>Pre-match (Week 1)</u>                                                          |                                                                                    |                                                                                     |                                                                                      |                                                                                      |                                                                                      |
|------------------------------------------------------------------------------------|------------------------------------------------------------------------------------|-------------------------------------------------------------------------------------|--------------------------------------------------------------------------------------|--------------------------------------------------------------------------------------|--------------------------------------------------------------------------------------|
|   |   |   |   |   |   |
| <b>4.1 Player A1</b>                                                               | <b>4.2 Player A2</b>                                                               | <b>4.3 Player A3</b>                                                                | <b>4.4 Player A4</b>                                                                 | <b>4.5 Player A5</b>                                                                 | <b>4.6 Player A6</b>                                                                 |
| <u>Post-match (Week 6)</u>                                                         |                                                                                    |                                                                                     |                                                                                      |                                                                                      |                                                                                      |
|  |  |  |  |  |  |
| <b>4.7 Player A1</b>                                                               | <b>4.8 Player A2</b>                                                               | <b>4.9 Player A3</b>                                                                | <b>4.10 Player A4</b>                                                                | <b>4.11 Player A5</b>                                                                | <b>4.12 Player A6</b>                                                                |

Figure 8. Images showcasing the batting backlift techniques of the experimental group (n = 6) over six weeks in the frontal plane

| <u>Pre-match (Week 1)</u>                                                          |                                                                                    |                                                                                     |                                                                                      |                                                                                      |                                                                                      |
|------------------------------------------------------------------------------------|------------------------------------------------------------------------------------|-------------------------------------------------------------------------------------|--------------------------------------------------------------------------------------|--------------------------------------------------------------------------------------|--------------------------------------------------------------------------------------|
|   |   |   |   |   |   |
| <b>5.1 Player B1</b>                                                               | <b>5.2 Player B2</b>                                                               | <b>5.3 Player B3</b>                                                                | <b>5.4 Player B4</b>                                                                 | <b>5.5 Player B5</b>                                                                 | <b>5.6 Player B6</b>                                                                 |
| <u>Post-match (Week 6)</u>                                                         |                                                                                    |                                                                                     |                                                                                      |                                                                                      |                                                                                      |
|  |  |  |  |  |  |
| <b>5.7 Player B1</b>                                                               | <b>5.8 Player B2</b>                                                               | <b>5.9 Player B3</b>                                                                | <b>5.10 Player B4</b>                                                                | <b>5.11 Player B5</b>                                                                | <b>5.12 Player B6</b>                                                                |

Figure 9. Images showcasing the batting backlift techniques of the control group (n = 6) over six weeks in the transverse plane

| <u>Pre-match (Week 1)</u>                                                          |                                                                                    |                                                                                     |                                                                                      |                                                                                      |                                                                                      |
|------------------------------------------------------------------------------------|------------------------------------------------------------------------------------|-------------------------------------------------------------------------------------|--------------------------------------------------------------------------------------|--------------------------------------------------------------------------------------|--------------------------------------------------------------------------------------|
|   |   |   |   |   |   |
| 6.1 Player A1                                                                      | 6.2 Player A2                                                                      | 6.3 Player A3                                                                       | 6.4 Player A4                                                                        | 6.5 Player A5                                                                        | 6.6 Player A6                                                                        |
| <u>Post-match (Week 6)</u>                                                         |                                                                                    |                                                                                     |                                                                                      |                                                                                      |                                                                                      |
|  |  |  |  |  |  |
| 6.7 Player A1                                                                      | 6.8 Player A2                                                                      | 6.9 Player A3                                                                       | 6.10 Player A4                                                                       | 6.11 Player A5                                                                       | 6.12 Player A6                                                                       |

Figure 10. Images showcasing the batting backlift techniques of the experimental group (n = 6) over six weeks in the transverse plane

| <u>Pre-match (Week 1)</u>                                                          |                                                                                    |                                                                                     |                                                                                      |                                                                                      |                                                                                      |
|------------------------------------------------------------------------------------|------------------------------------------------------------------------------------|-------------------------------------------------------------------------------------|--------------------------------------------------------------------------------------|--------------------------------------------------------------------------------------|--------------------------------------------------------------------------------------|
|   |   |   |   |   |   |
| <b>7.1 Player B1</b>                                                               | <b>7.2 Player B2</b>                                                               | <b>7.3 Player B3</b>                                                                | <b>7.4 Player B4</b>                                                                 | <b>7.5 Player B5</b>                                                                 | <b>7.6 Player B6</b>                                                                 |
| <u>Post-match (Week 6)</u>                                                         |                                                                                    |                                                                                     |                                                                                      |                                                                                      |                                                                                      |
|  |  |  |  |  |  |
| <b>7.7 Player B1</b>                                                               | <b>7.8 Player B2</b>                                                               | <b>7.9 Player B3</b>                                                                | <b>7.10 Player B4</b>                                                                | <b>7.11 Player B5</b>                                                                | <b>7.12 Player B6</b>                                                                |
